# Supplementary material
Source: PubMed Central journal article supplement (PMC3276469)

Figure S1

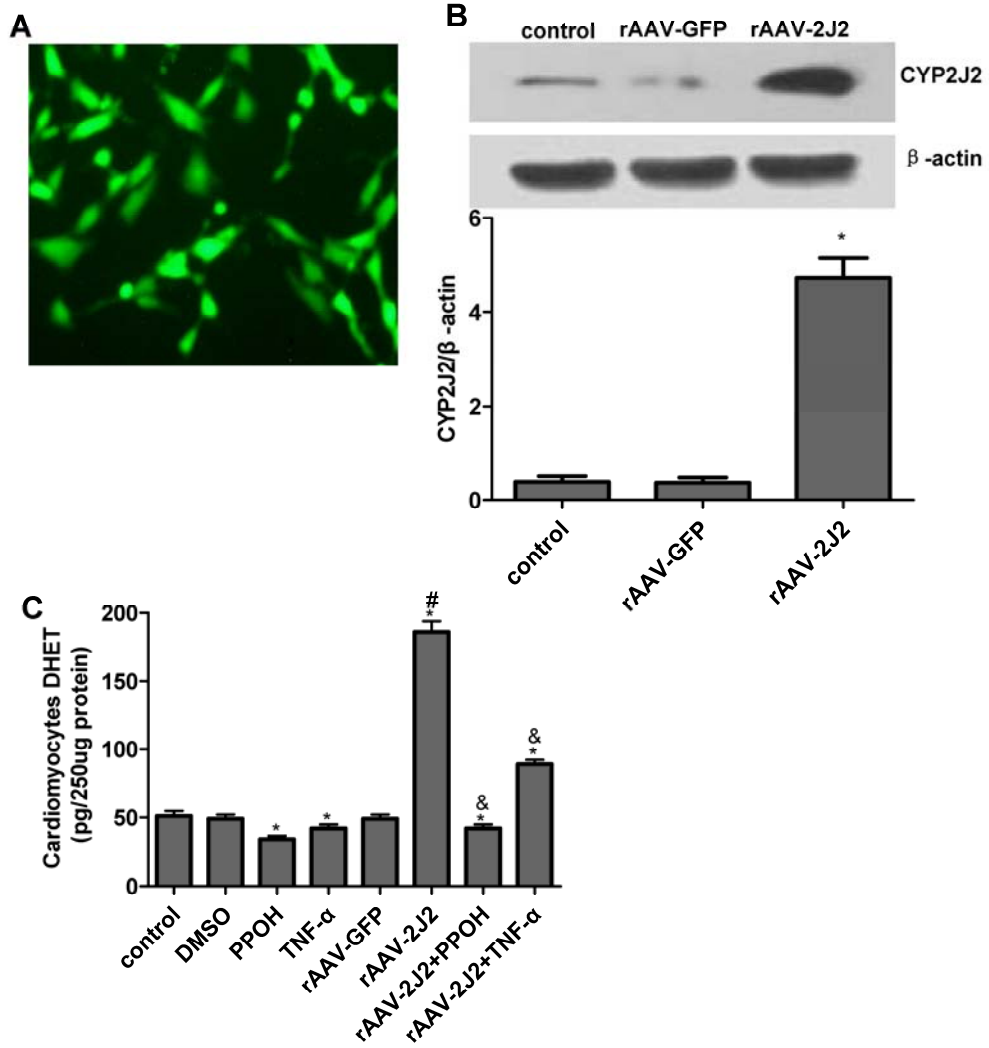

Figure S2

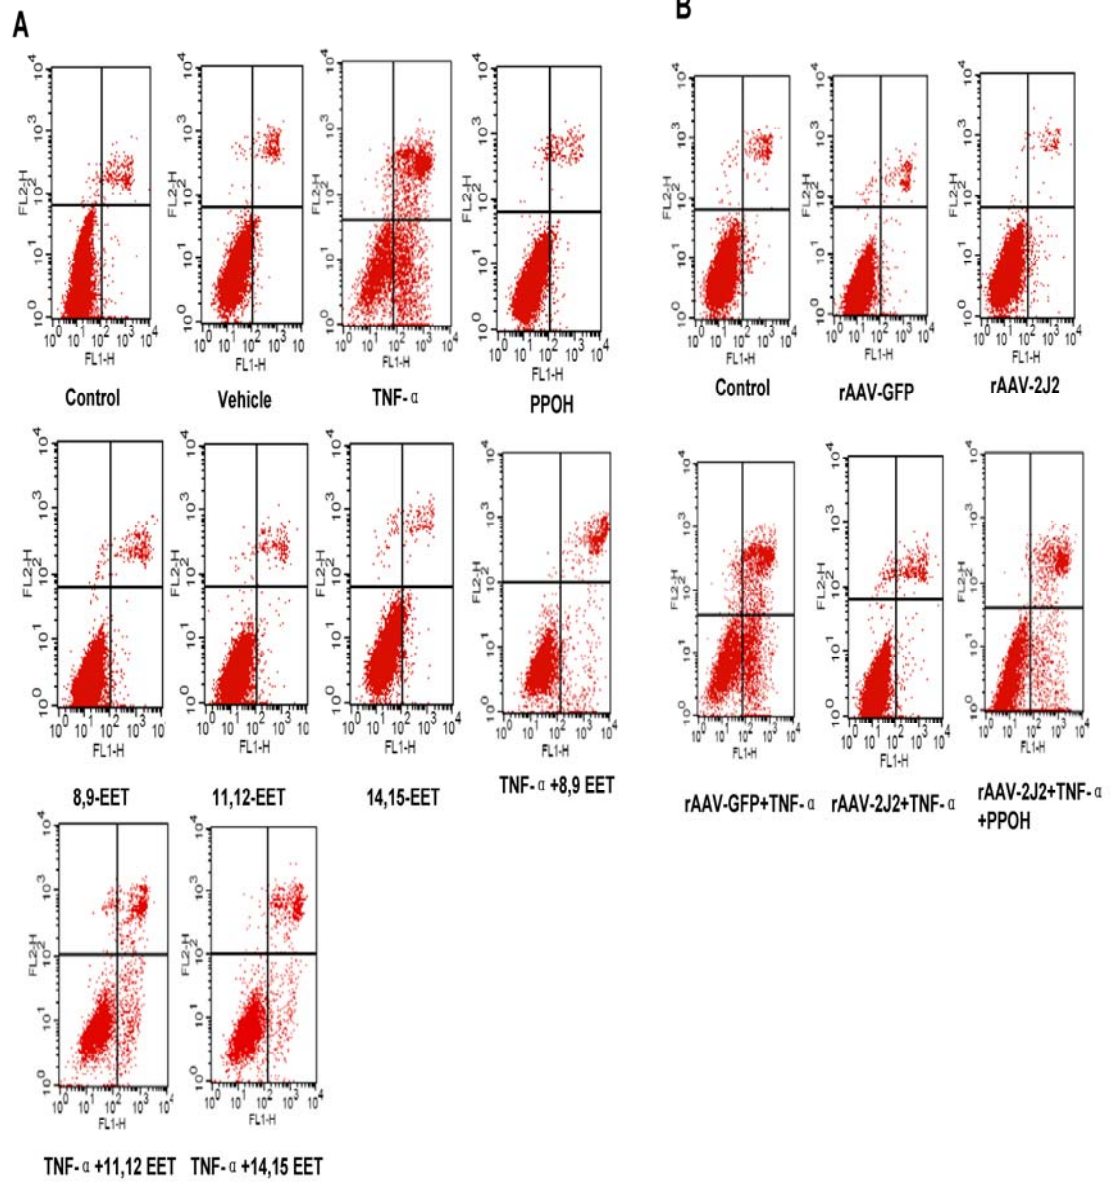

Figure S3

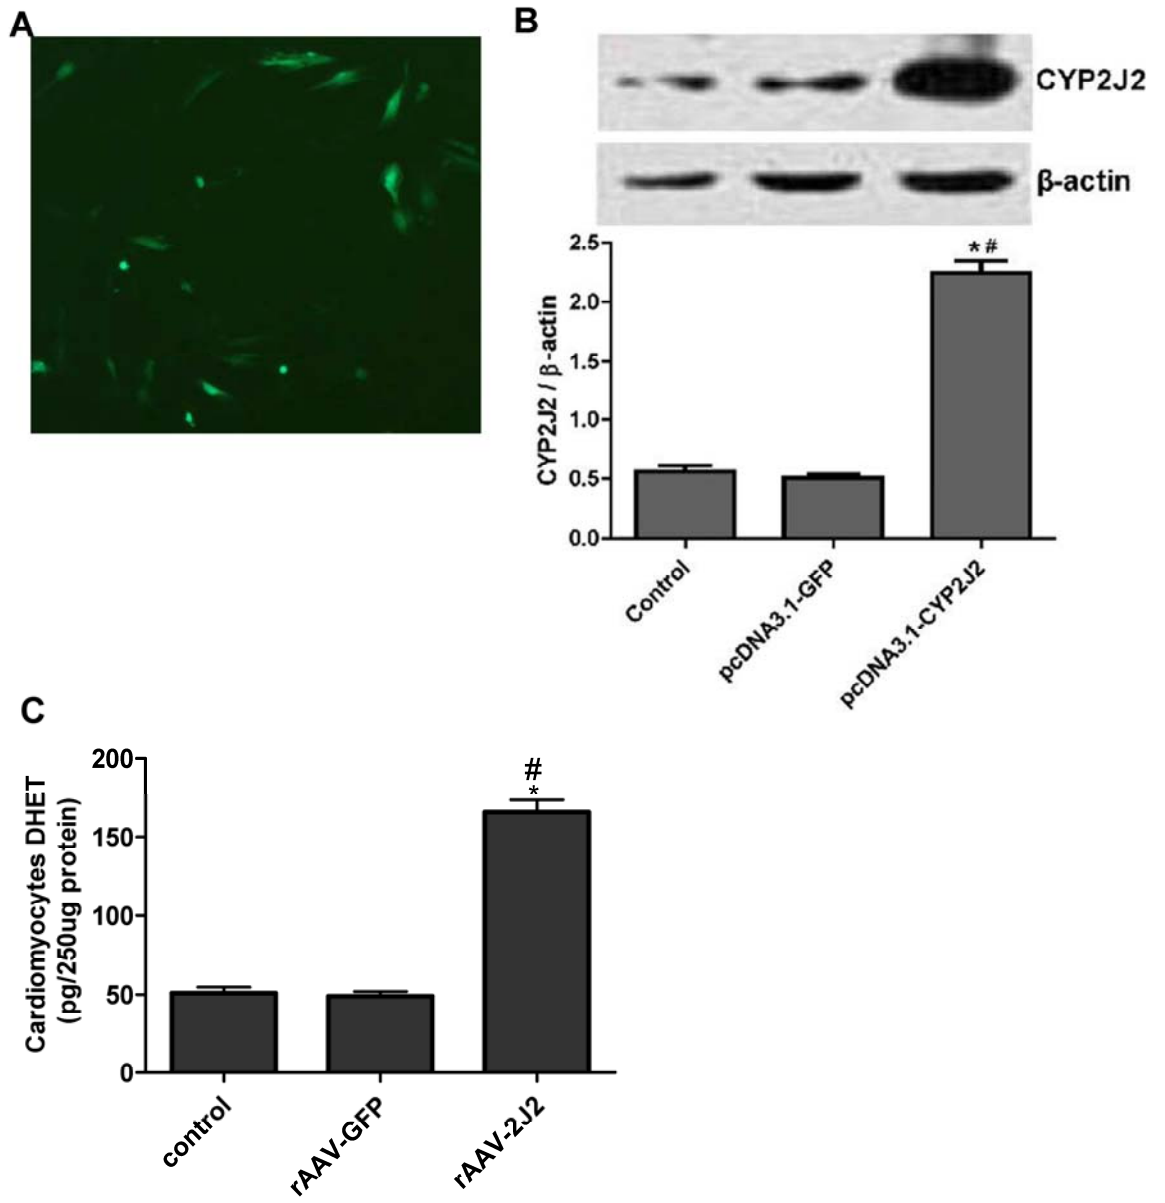

Figure S4

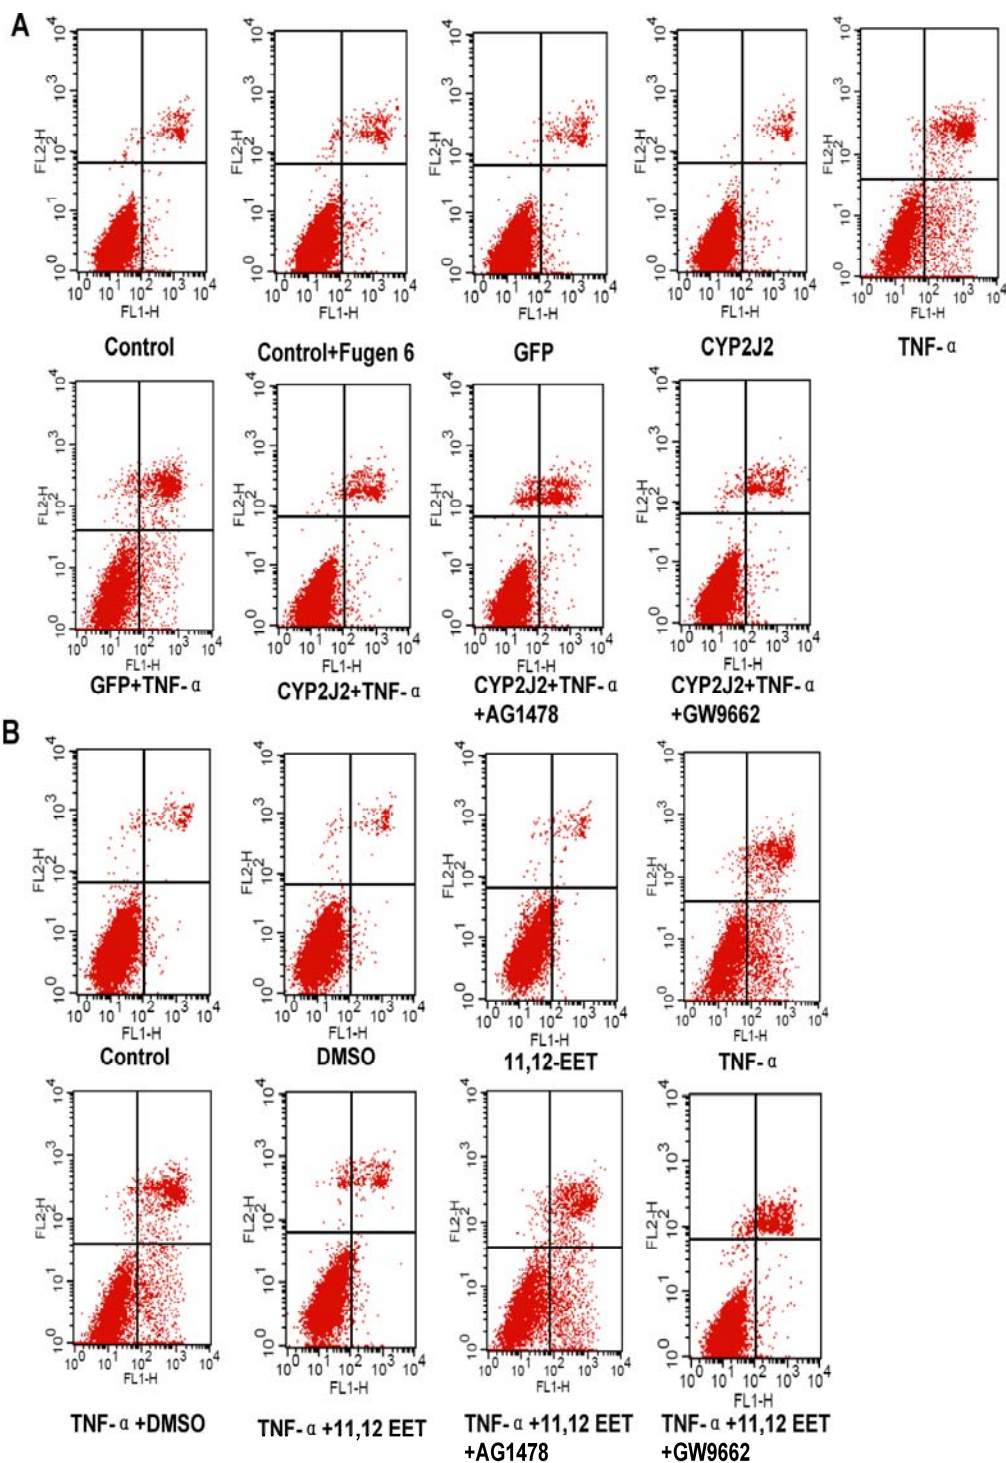

**Figure S5**

**A**

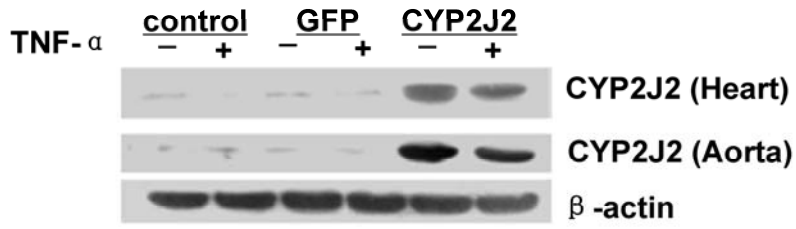

**B**

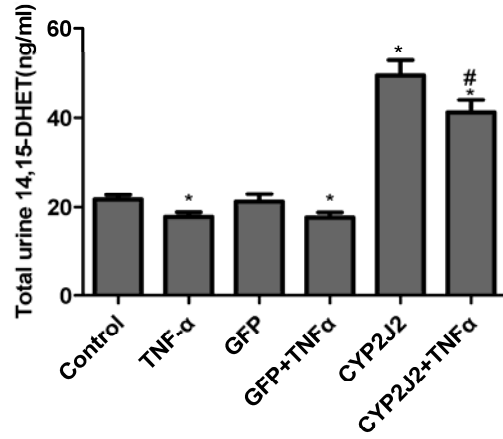

**C**

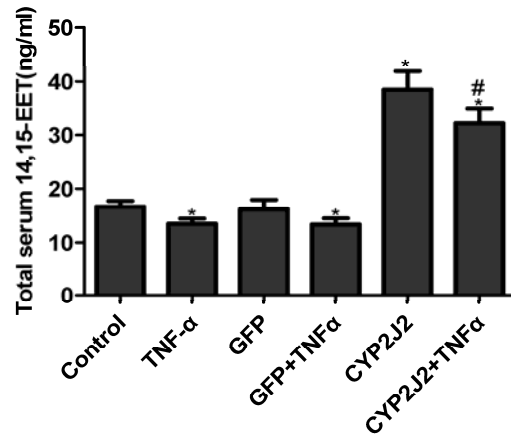

Supplement: supp_M017319_jlr.M017319-1.pdf [file supp_M017319_jlr.M017319-1.pdf]
